# Supplementary material for: Two pairs of chiral YbIII enantiomers presenting distinct NIR luminescence and circularly polarized luminescence performances with giant differences in second-harmonic generation responses
Source: Royal Society of Chemistry journal article supplement (doi:10.1039/d3dt03324d), 2023-01-01
Supplement: d3dt03324d1.pdf [file d3dt03324d1.pdf]

## Supporting information for

### **Two pairs of chiral Yb<sup>III</sup> enantiomers presenting distinct NIR luminescence and circularly polarized luminescence performances with giant differences in second-harmonic generation responses**

Xiaodi Du,<sup>\*a</sup> Zhiqiang Zhang,<sup>b</sup> Congli Gao,<sup>b</sup> Fengcai Li,<sup>b</sup> and Xi-Li Li<sup>\*b</sup>

<sup>a</sup>*College of Chemistry and Chemical Engineering, Zhoukou Normal University, Zhoukou 466001, China. E-mail: duxiaodi2000@163.com*

<sup>b</sup>*Henan Provincial Key Laboratory of Surface and Interface Science, Zhengzhou University of Light Industry, Zhengzhou 450002, China. E-mail: lixl@zzuli.edu.cn*

## Table of Contents

|                                                                                                                                                                                           |     |
|-------------------------------------------------------------------------------------------------------------------------------------------------------------------------------------------|-----|
| CPL measurement details.                                                                                                                                                                  | S3  |
| Characterization technique for nonlinear optical (NLO) response.                                                                                                                          | S3  |
| <b>Scheme S1.</b> Chemical structures of enantiomerically pure bidentate <i>N</i> -donor ligands ${}^1L_R$ and ${}^1L_S$ .                                                                | S4  |
| <b>Fig. S1.</b> Coordination geometries of Yb1 in <b>D-1</b> and <b>L-1</b> .                                                                                                             | S4  |
| <b>Fig. S2.</b> Coordination geometries of Yb1 in <b>D-2</b> and <b>L-2</b> .                                                                                                             | S4  |
| <b>Fig. S3.</b> Coordination geometries of Yb2 in <b>D-2</b> and <b>L-2</b> .                                                                                                             | S4  |
| <b>Fig. S4.</b> Simulative and experimental PXRD patterns for <b>D-1/L-1</b> and <b>D-2/L-2</b> .                                                                                         | S5  |
| <b>Fig. S5.</b> Energy levels corresponding to the Yb <sup>III</sup> emissions in <b>D-1</b> and <b>D-2</b> .                                                                             | S5  |
| <b>Fig. S6.</b> Solid-state decay curves of <b>D-1</b> (a) and <b>D-2</b> (b) with fitted curves (red).                                                                                   | S5  |
| <b>Fig. S7.</b> Solid-state decay curve of <b>D-2</b> , fitted by a double-exponential function.                                                                                          | S6  |
| <b>Fig. S8.</b> Plots of $g_{lum}$ versus wavelength for <b>D-1/L-1</b> (a) and <b>D-2/L-2</b> (b).                                                                                       | S6  |
| <b>Fig. S9.</b> SHG spectra of <b>D-1/L-1</b> and Yb(btfa) <sub>3</sub> (H <sub>2</sub> O) <sub>2</sub> under excitation at $\lambda = 1550$ nm ( $T_{int} = 0.5$ s) at room temperature. | S6  |
| <b>Fig. S10.</b> SHG spectra of <b>D-2/L-2</b> and Yb(dbm) <sub>3</sub> (H <sub>2</sub> O) under excitation at $\lambda = 1550$ nm ( $T_{int} = 0.5$ s) at room temperature.              | S7  |
| <b>Table S1.</b> Crystallographic data and structure refinement parameters for <b>D-1/L-1</b> and <b>D-2/L-2</b> enantiomeric pairs.                                                      | S8  |
| <b>Table S2.</b> Selected bond lengths (Å) and angles (°) for <b>D-1</b> and <b>L-1</b> .                                                                                                 | S9  |
| <b>Table S3.</b> Selected bond lengths (Å) and angles (°) for <b>D-2</b> and <b>L-2</b> .                                                                                                 | S10 |
| <b>Table S4.</b> Continuous shape measures calculation for Yb1 in <b>D-1</b> .                                                                                                            | S11 |
| <b>Table S5.</b> Continuous shape measures calculation for Yb1 in <b>D-2</b> .                                                                                                            | S12 |
| <b>Table S6.</b> Continuous shape measures calculation for Yb2 in <b>D-2</b> .                                                                                                            | S13 |
| <b>Table S7.</b> Calculated dipole moments of <b>D-1</b> and <b>D-2</b> .                                                                                                                 | S13 |

## Measurement details:

### 1. CPL measurement:

Solid-state CPL spectra of **D-1/L-1** and **D-2/L-2** were recorded on an OLIS NIR-CPL SOLO based on their crystalline samples which were ground and then well-sandwiched by using two quartz slides. In addition, to eliminate the potential contributions of linear dichroism and birefringence, different spectra were recorded by rotating each sample by  $\pm 45^\circ$  and  $\pm 90^\circ$  around the optical axis, and by flipping each sample by  $180^\circ$  around the axis perpendicular to the light beam. The average spectra were adopted and reported.

### 2. Characterization technique for nonlinear optical (NLO) response:

Schematic diagram of the device for testing NLO responses of crystalline materials has been reported elsewhere.<sup>1</sup> Excitation light ( $\lambda_{\text{ex}} = 1550$  nm) is generated by using an ultrafast fiber laser (100 mW, NPI Lasers, Rainbow 1550 OEM), whose pulse width is 100 fs and the repetition rate is 80 MHz. Then the light beam is focused by using an aspheric lens (N.A. = 0.8) to form a laser spot on the crystalline sample with the beam waist radius being 2  $\mu\text{m}$ . The measurements of SHG responses for **D-1/L-1**, **D-2/L-2**,  $\text{Yb}(\text{btfa})_3(\text{H}_2\text{O})_2$ ,  $\text{Yb}(\text{dbm})_3(\text{H}_2\text{O})$  and KDP were conducted using their crystalline samples with the identical particle size range ( $< 30$   $\mu\text{m}$ ). Their SHG signals were obtained under the identical integration time ( $T_{\text{int}} = 0.5$  s), and their SHG spectra are recorded on a cooled fiber optic spectrometer (Ideaoptics, NOVA).

### Reference:

1. M. Cui, L. Yang, F. Li, L. Zhou, Y. Song, S.-M. Fang, C.-M. Liu and X.-L. Li, *Inorg. Chem.*, 2021, **60**, 13366–13375.

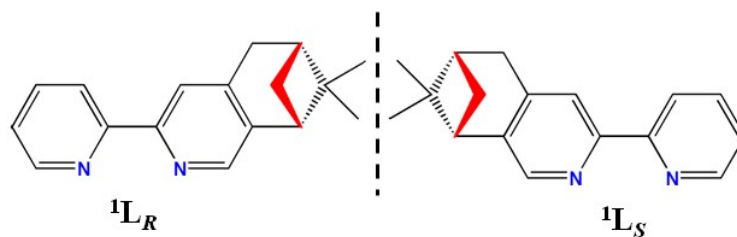

**Scheme S1.** Chemical structures of enantiomerically pure bidentate *N*-donor ligands  ${}^1L_R/{}^1L_S$ .

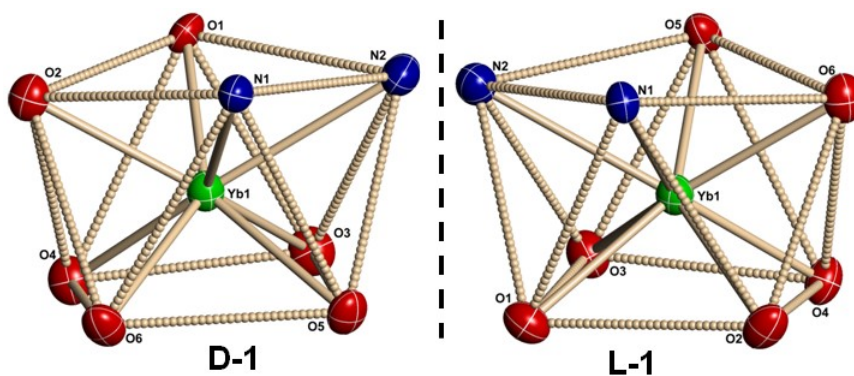

**Fig. S1.** Coordination geometries of Yb1 in **D-1** and **L-1**.

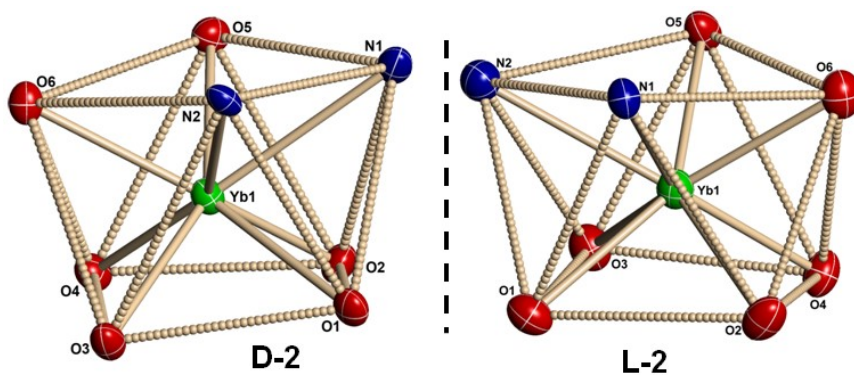

**Fig. S2.** Coordination geometries of Yb1 in **D-2** and **L-2**.

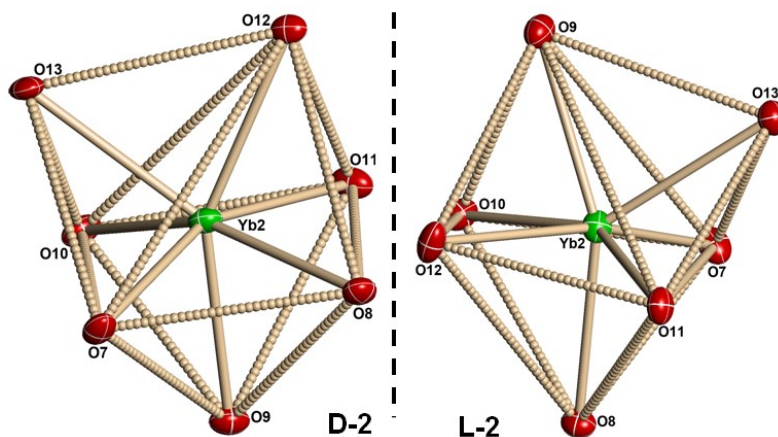

**Fig. S3.** Coordination geometries of Yb2 in **D-2** and **L-2**.

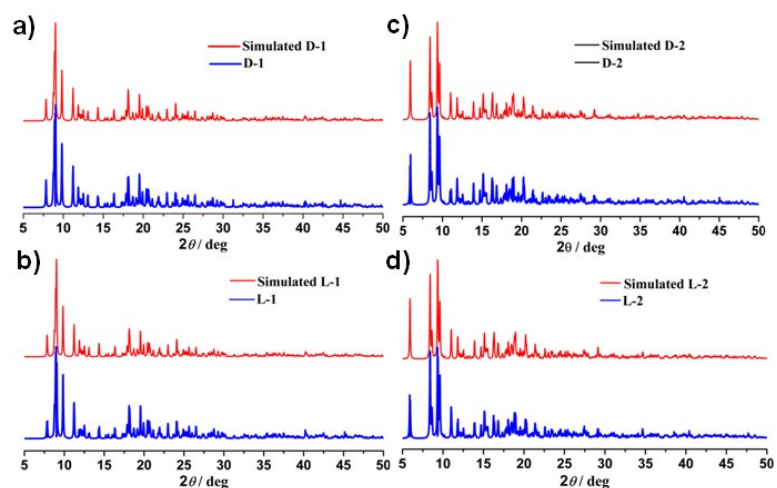

**Fig. S4.** Simulative and experimental PXRD patterns for **D-1/L-1** (a/b) and **D-2/L-2** (c/d).

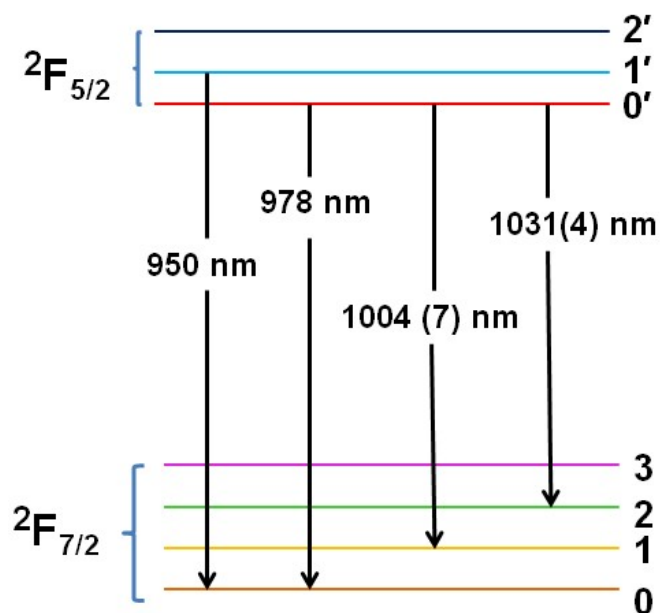

**Fig. S5.** Energy levels corresponding to the  $\text{Yb}^{\text{III}}$  emissions in **D-1** and **D-2**.

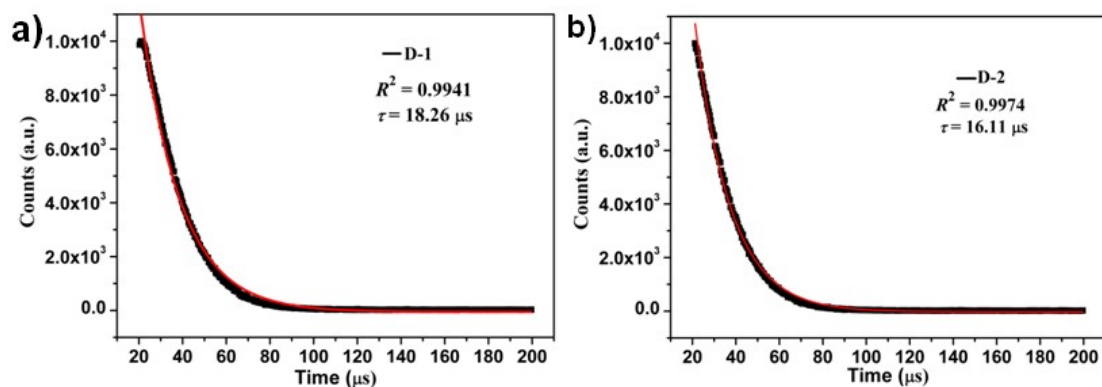

**Fig. S6.** Solid-state decay curves of **D-1** (a) and **D-2** (b) with fitted curves (red).

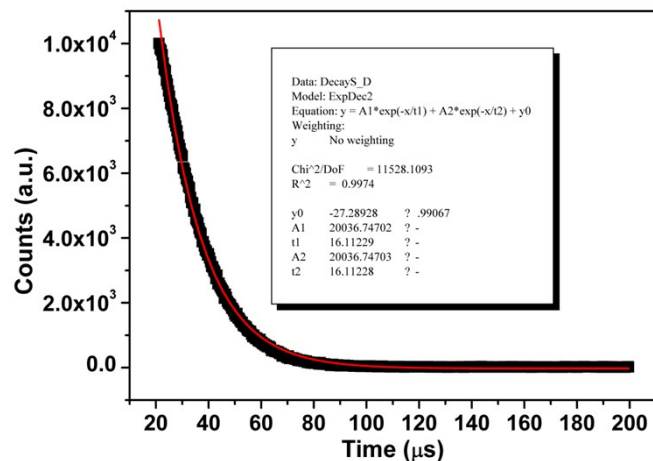

**Fig. S7.** Solid-state decay curve of **D-2**, fitted by a double-exponential function.

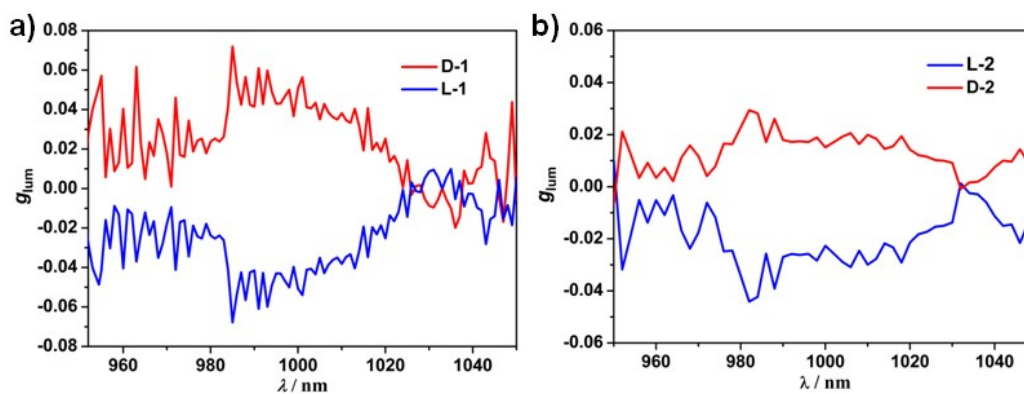

**Fig. S8.** Plots of  $g_{lum}$  versus wavelength for **D-1/L-1** (a) and **D-2/L-2** (b).

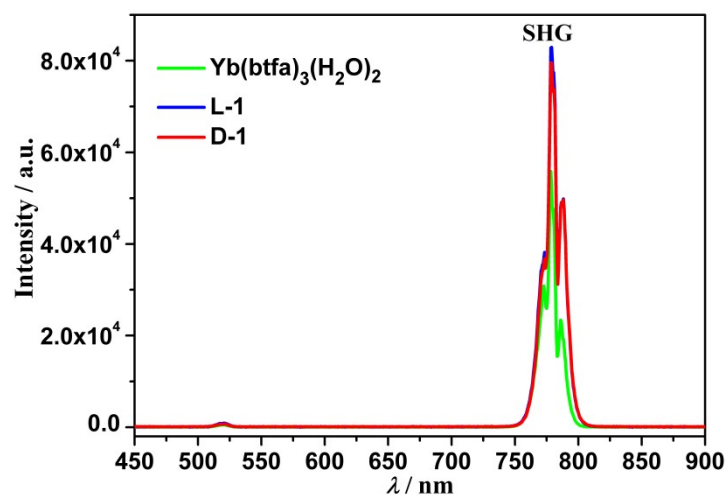

**Fig. S9.** SHG spectra of **D-1/L-1** and  $\text{Yb}(\text{btfa})_3(\text{H}_2\text{O})_2$  under excitation at  $\lambda = 1550$  nm ( $T_{int} = 0.5$  s) at room temperature.

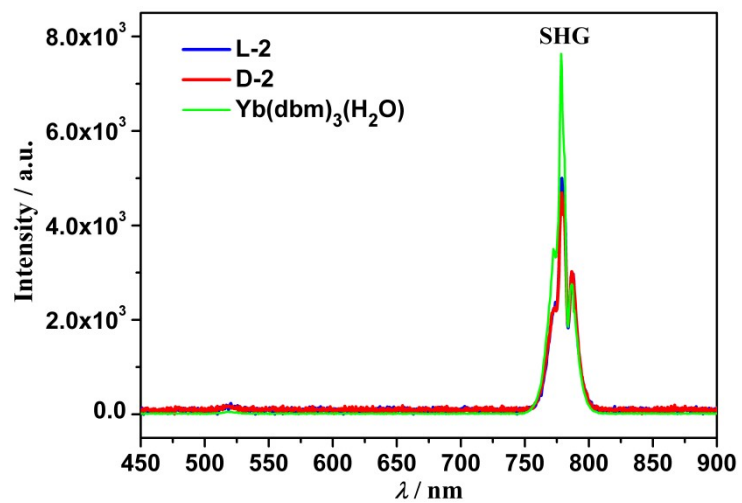

**Fig. S10.** SHG spectra of **D-2/L-2** and  $\text{Yb}(\text{dbm})_3(\text{H}_2\text{O})$  under excitation at  $\lambda = 1550$  nm ( $T_{\text{int}} = 0.5$  s) at room temperature.

**Table S1.** Crystallographic data and structure refinement parameters for **D-1/L-1** and **D-2/L-2** enantiomeric pairs.

| Complexes                                                         | <b>D-1</b>                                                                      | <b>L-1</b>                                                                      | <b>D-2</b>                                                                      | <b>L-2</b>                                                                      |
|-------------------------------------------------------------------|---------------------------------------------------------------------------------|---------------------------------------------------------------------------------|---------------------------------------------------------------------------------|---------------------------------------------------------------------------------|
| Chemical formula                                                  | C <sub>46</sub> H <sub>35</sub> F <sub>9</sub> N <sub>3</sub> O <sub>6</sub> Yb | C <sub>46</sub> H <sub>35</sub> F <sub>9</sub> N <sub>3</sub> O <sub>6</sub> Yb | C <sub>108</sub> H <sub>89</sub> N <sub>3</sub> O <sub>13</sub> Yb <sub>2</sub> | C <sub>108</sub> H <sub>89</sub> N <sub>3</sub> O <sub>13</sub> Yb <sub>2</sub> |
| Formula weight                                                    | 1069.81                                                                         | 1069.81                                                                         | 1982.90                                                                         | 1982.90                                                                         |
| Crystal system                                                    | monoclinic                                                                      | monoclinic                                                                      | monoclinic                                                                      | monoclinic                                                                      |
| Space group                                                       | <i>P2</i> <sub>1</sub>                                                          | <i>P2</i> <sub>1</sub>                                                          | <i>P2</i> <sub>1</sub>                                                          | <i>P2</i> <sub>1</sub>                                                          |
| <i>a</i> (Å)                                                      | 10.1341(9)                                                                      | 10.1213(6)                                                                      | 10.3289(6)                                                                      | 10.3498(7)                                                                      |
| <i>b</i> (Å)                                                      | 19.8579(13)                                                                     | 19.8331(10)                                                                     | 20.9947(12)                                                                     | 21.0293(11)                                                                     |
| <i>c</i> (Å)                                                      | 11.3131(8)                                                                      | 11.3132(8)                                                                      | 21.4061(12)                                                                     | 21.4472(14)                                                                     |
| $\alpha = \gamma$ (deg)                                           | 90                                                                              | 90                                                                              | 90                                                                              | 90                                                                              |
| $\beta$ (deg)                                                     | 95.212(7)                                                                       | 95.262(6)                                                                       | 98.852(6)                                                                       | 98.962(6)                                                                       |
| <i>V</i> (Å <sup>3</sup> )                                        | 2267.3(3)                                                                       | 2261.4(2)                                                                       | 4586.7(5)                                                                       | 4611.0(5)                                                                       |
| <i>Z</i>                                                          | 2                                                                               | 2                                                                               | 2                                                                               | 2                                                                               |
| <i>D</i> <sub>c</sub> (g cm <sup>-3</sup> )                       | 1.567                                                                           | 1.571                                                                           | 1.436                                                                           | 1.428                                                                           |
| $\mu$ (mm <sup>-1</sup> )                                         | 2.150                                                                           | 2.155                                                                           | 2.092                                                                           | 2.081                                                                           |
| F(000)                                                            | 1062                                                                            | 1062                                                                            | 2004                                                                            | 2004                                                                            |
| Reflections collected                                             | 10216                                                                           | 19253                                                                           | 19918                                                                           | 21763                                                                           |
| Independent reflections                                           | 6678                                                                            | 9890                                                                            | 14260                                                                           | 15146                                                                           |
| Data/restraints/parameters                                        | 6678/1/588                                                                      | 9890/971/588                                                                    | 14260/2/1142                                                                    | 15146/2/1142                                                                    |
| GOF                                                               | 0.982                                                                           | 1.035                                                                           | 0.999                                                                           | 0.928                                                                           |
| <i>R</i> <sub>1</sub> [ <i>I</i> > 2σ( <i>I</i> )] <sup>a</sup>   | 0.0468                                                                          | 0.0660                                                                          | 0.0543                                                                          | 0.0572                                                                          |
| w <i>R</i> <sub>2</sub> [ <i>I</i> > 2σ( <i>I</i> )] <sup>b</sup> | 0.0625                                                                          | 0.1300                                                                          | 0.0828                                                                          | 0.0782                                                                          |
| Flack parameter                                                   | 0.017(9)                                                                        | 0.026(15)                                                                       | 0.017(8)                                                                        | 0.015(7)                                                                        |
| CCDC                                                              | 2290257                                                                         | 2290258                                                                         | 2290259                                                                         | 2290260                                                                         |

$${}^a R_1 = \sum ||F_o| - |F_c|| / \sum |F_o|, \quad {}^b wR_2 = [\sum w(F_o^2 - F_c^2)^2 / \sum w(F_o^2)^2]^{1/2}$$



**Table S2.** Selected bond lengths (Å) and angles (°) for **D-1** and **L-1**.

| Bond lengths for <b>D-1</b> |           |                 |           |                 |           |
|-----------------------------|-----------|-----------------|-----------|-----------------|-----------|
| Yb(1)—O(1)                  | 2.255(10) | Yb(1)—O(2)      | 2.262(7)  | Yb(1)—O(3)      | 2.277(6)  |
| Yb(1)—O(4)                  | 2.260(7)  | Yb(1)—O(5)      | 2.276(9)  | Yb(1)—O(6)      | 2.295(7)  |
| Yb(1)—N(1)                  | 2.489(8)  | Yb(1)—N(2)      | 2.531(7)  |                 |           |
| Bond lengths for <b>L-1</b> |           |                 |           |                 |           |
| Yb(1)—O(1)                  | 2.273(9)  | Yb(1)—O(2)      | 2.313(12) | Yb(1)—O(3)      | 2.291(9)  |
| Yb(1)—O(4)                  | 2.282(8)  | Yb(1)—O(5)      | 2.286(10) | Yb(1)—O(6)      | 2.275(11) |
| Yb(1)—N(1)                  | 2.476(10) | Yb(1)—N(2)      | 2.532(10) |                 |           |
| Bond angles for <b>D-1</b>  |           |                 |           |                 |           |
| O(3)-Yb(1)-O(2)             | 139.0(3)  | O(3)-Yb(1)-O(5) | 79.4(4)   | O(6)-Yb(1)-O(5) | 73.1(3)   |
| O(1)-Yb(1)-O(3)             | 76.8(4)   | O(6)-Yb(1)-N(1) | 80.0(3)   | O(3)-Yb(1)-N(2) | 78.7(2)   |
| Bond angles for <b>L-1</b>  |           |                 |           |                 |           |
| O(3)-Yb(1)-O(2)             | 78.7(5)   | O(3)-Yb(1)-O(5) | 139.1(4)  | O(6)-Yb(1)-O(5) | 72.6(4)   |
| O(1)-Yb(1)-O(3)             | 122.1(4)  | O(6)-Yb(1)-N(1) | 103.1(4)  | O(3)-Yb(1)-N(2) | 77.9(3)   |

**Table S3.** Selected bond lengths (Å) and angles (°) for **D-2** and **L-2**.

| Bond lengths for <b>D-2</b> |          |                  |          |                  |          |
|-----------------------------|----------|------------------|----------|------------------|----------|
| Yb(1)—O(1)                  | 2.278(9) | Yb(1)—O(2)       | 2.240(8) | Yb(1)—O(3)       | 2.248(8) |
| Yb(1)—O(4)                  | 2.278(7) | Yb(1)—O(5)       | 2.267(8) | Yb(1)—O(6)       | 2.266(8) |
| Yb(1)—N(1)                  | 2.558(9) | Yb(1)—N(2)       | 2.546(9) | Yb(2)—O(13)      | 2.359(9) |
| Yb(2)—O(7)                  | 2.230(8) | Yb(2)—O(8)       | 2.247(9) | Yb(2)—O(9)       | 2.221(8) |
| Yb(2)—O(10)                 | 2.258(9) | Yb(2)—O(11)      | 2.249(8) | Yb(2)—O(12)      | 2.230(9) |
| Bond lengths for <b>L-2</b> |          |                  |          |                  |          |
| Yb(1)—O(1)                  | 2.300(7) | Yb(1)—O(2)       | 2.282(7) | Yb(1)—O(3)       | 2.249(8) |
| Yb(1)—O(4)                  | 2.293(7) | Yb(1)—O(5)       | 2.290(8) | Yb(1)—O(6)       | 2.263(8) |
| Yb(1)—N(1)                  | 2.577(9) | Yb(1)—N(2)       | 2.531(9) | Yb(2)—O(13)      | 2.364(9) |
| Yb(2)—O(7)                  | 2.260(8) | Yb(2)—O(8)       | 2.257(8) | Yb(2)—O(9)       | 2.253(8) |
| Yb(2)—O(10)                 | 2.224(8) | Yb(2)—O(11)      | 2.255(8) | Yb(2)—O(12)      | 2.240(8) |
| Bond angles for <b>D-2</b>  |          |                  |          |                  |          |
| O(3)-Yb(1)-O(2)             | 115.4(3) | O(3)-Yb(1)-O(5)  | 79.3(3)  | O(6)-Yb(1)-O(5)  | 75.0(3)  |
| O(1)-Yb(1)-O(3)             | 73.4(3)  | O(6)-Yb(1)-N(1)  | 115.5(3) | O(3)-Yb(1)-N(2)  | 135.9(3) |
| O(5)-Yb(1)-N(2)             | 103.8(3) | O(2)-Yb(1)-N(1)  | 134.9(3) | N(1)-Yb(1)-N(2)  | 62.8(3)  |
| O(9)-Yb(2)-O(12)            | 150.1(3) | O(7)-Yb(2)-O(8)  | 75.5(3)  | O(7)-Yb(2)-O(10) | 106.0(3) |
| O(8)-Yb(2)-O(11)            | 90.7(3)  | O(9)-Yb(2)-O(10) | 75.8(3)  | O(8)-Yb(2)-O(10) | 154.2(3) |
| Bond angles for <b>L-2</b>  |          |                  |          |                  |          |
| O(3)-Yb(1)-O(2)             | 143.7(2) | O(3)-Yb(1)-O(5)  | 73.8(3)  | O(6)-Yb(1)-O(5)  | 73.0(3)  |
| O(1)-Yb(1)-O(3)             | 79.6(3)  | O(6)-Yb(1)-N(1)  | 134.9(3) | O(3)-Yb(1)-N(2)  | 136.6(3) |
| O(5)-Yb(1)-N(2)             | 74.6(3)  | O(2)-Yb(1)-N(1)  | 115.1(3) | N(1)-Yb(1)-N(2)  | 63.2(3)  |
| O(9)-Yb(2)-O(12)            | 80.3(3)  | O(7)-Yb(2)-O(8)  | 75.9(3)  | O(7)-Yb(2)-O(10) | 79.2(3)  |
| O(8)-Yb(2)-O(11)            | 82.8(3)  | O(9)-Yb(2)-O(10) | 76.2(3)  | O(8)-Yb(2)-O(10) | 79.1(3)  |

**Table S4.** Continuous shape measures calculation for Yb1 in **D-1**.

|                 |        |          |                                            |       |              |       |        |          |         |        |       |        |         |
|-----------------|--------|----------|--------------------------------------------|-------|--------------|-------|--------|----------|---------|--------|-------|--------|---------|
| OP-8            | 1      | $D_{8h}$ | Octagon                                    |       |              |       |        |          |         |        |       |        |         |
| HPY-8           | 2      | $C_{7v}$ | Heptagonal pyramid                         |       |              |       |        |          |         |        |       |        |         |
| HBPY-8          | 3      | $D_{6h}$ | Hexagonal bipyramid                        |       |              |       |        |          |         |        |       |        |         |
| CU-8            | 4      | $O_h$    | Cube                                       |       |              |       |        |          |         |        |       |        |         |
| SAPR-8          | 5      | $D_{4d}$ | Square antiprism                           |       |              |       |        |          |         |        |       |        |         |
| TDD-8           | 6      | $D_{2d}$ | Triangular dodecahedron                    |       |              |       |        |          |         |        |       |        |         |
| JGBF-8          | 7      | $D_{2d}$ | Johnson gyrobifastigium J26                |       |              |       |        |          |         |        |       |        |         |
| JETBPY-8        | 8      | $D_{3h}$ | Johnson elongated triangular bipyramid J14 |       |              |       |        |          |         |        |       |        |         |
| JBTPR-8         | 9      | $C_{2v}$ | Biaugmented trigonal prism J50             |       |              |       |        |          |         |        |       |        |         |
| BTPR-8          | 10     | $C_{2v}$ | Biaugmented trigonal prism                 |       |              |       |        |          |         |        |       |        |         |
| JSD-8           | 11     | $D_{2d}$ | Snub diphenoïd J84                         |       |              |       |        |          |         |        |       |        |         |
| TT-8            | 12     | $T_d$    | Triakis tetrahedron                        |       |              |       |        |          |         |        |       |        |         |
| ETBPY-8         | 13     | $D_{3h}$ | Elongated trigonal bipyrami                |       |              |       |        |          |         |        |       |        |         |
| Structure [ML8] | OP-8   | HPY-8    | HBPY-8                                     | CU-8  | SAPR-8       | TDD-8 | JGBF-8 | JETBPY-8 | JBTPR-8 | BTPR-8 | JSD-8 | TT-8   | ETBPY-8 |
| ABOXIY          | 28.888 | 22.973   | 16.427                                     | 9.791 | <b>0.652</b> | 1.639 | 15.122 | 27.158   | 2.172   | 1.638  | 4.221 | 10.467 | 23.489  |

**Table S5.** Continuous shape measures calculation for Yb1 in **D-2**.

|                 |        |          |                                            |        |              |       |        |          |         |        |       |        |         |
|-----------------|--------|----------|--------------------------------------------|--------|--------------|-------|--------|----------|---------|--------|-------|--------|---------|
| OP-8            | 1      | $D_{8h}$ | Octagon                                    |        |              |       |        |          |         |        |       |        |         |
| HPY-8           | 2      | $C_{7v}$ | Heptagonal pyramid                         |        |              |       |        |          |         |        |       |        |         |
| HBPY-8          | 3      | $D_{6h}$ | Hexagonal bipyramid                        |        |              |       |        |          |         |        |       |        |         |
| CU-8            | 4      | $O_h$    | Cube                                       |        |              |       |        |          |         |        |       |        |         |
| SAPR-8          | 5      | $D_{4d}$ | Square antiprism                           |        |              |       |        |          |         |        |       |        |         |
| TDD-8           | 6      | $D_{2d}$ | Triangular dodecahedron                    |        |              |       |        |          |         |        |       |        |         |
| JGBF-8          | 7      | $D_{2d}$ | Johnson gyrobifastigium J26                |        |              |       |        |          |         |        |       |        |         |
| JETBPY-8        | 8      | $D_{3h}$ | Johnson elongated triangular bipyramid J14 |        |              |       |        |          |         |        |       |        |         |
| JBTPR-8         | 9      | $C_{2v}$ | Biaugmented trigonal prism J50             |        |              |       |        |          |         |        |       |        |         |
| BTPR-8          | 10     | $C_{2v}$ | Biaugmented trigonal prism                 |        |              |       |        |          |         |        |       |        |         |
| JSD-8           | 11     | $D_{2d}$ | Snub diphenoïd J84                         |        |              |       |        |          |         |        |       |        |         |
| TT-8            | 12     | $T_d$    | Triakis tetrahedron                        |        |              |       |        |          |         |        |       |        |         |
| ETBPY-8         | 13     | $D_{3h}$ | Elongated trigonal bipyrami                |        |              |       |        |          |         |        |       |        |         |
| Structure [ML8] | OP-8   | HPY-8    | HBPY-8                                     | CU-8   | SAPR-8       | TDD-8 | JGBF-8 | JETBPY-8 | JBTPR-8 | BTPR-8 | JSD-8 | TT-8   | ETBPY-8 |
| ABOXIY          | 29.472 | 23.267   | 15.925                                     | 10.470 | <b>0.606</b> | 2.040 | 14.932 | 26.907   | 2.394   | 1.933  | 4.385 | 11.221 | 23.388  |

**Table S6.** Continuous shape measures calculation for Yb2 in **D-2**.

|                 |            |                                         |        |              |        |         |         |
|-----------------|------------|-----------------------------------------|--------|--------------|--------|---------|---------|
| HP-7            | 1 $D_{7h}$ | Heptagon                                |        |              |        |         |         |
| HPY-7           | 2 $C_{6v}$ | Hexagonal pyramid                       |        |              |        |         |         |
| PBPY-7          | 3 $D_{5h}$ | Pentagonal bipyramid                    |        |              |        |         |         |
| COC-7           | 4 $C_{3v}$ | Capped octahedron                       |        |              |        |         |         |
| CTPR-7          | 5 $C_{2v}$ | Capped trigonal prism                   |        |              |        |         |         |
| JPBPY-7         | 6 $D_{5h}$ | Johnson pentagonal bipyramid J13        |        |              |        |         |         |
| JETPY-7         | 7 $C_{3v}$ | Johnson elongated triangular pyramid J7 |        |              |        |         |         |
| Structure [ML7] | HP-7       | HPY-7                                   | PBPY-7 | COC-7        | CTPR-7 | JPBPY-7 | JETPY-7 |
| ABOXIY          | 35.069     | 19.607                                  | 7.231  | <b>0.514</b> | 1.060  | 10.831  | 18.518  |

**Table S7.** Calculated dipole moments of **D-1** and **D-2**.

| Compound                 | <b>D-1</b> | <b>D-2</b> |
|--------------------------|------------|------------|
| $\mu_{\text{total}}$ (D) | 7.1437     | 2.7289     |
| X                        | -4.0079    | -0.1079    |
| Y                        | 2.0216     | 1.9393     |
| Z                        | 5.5198     | -1.9169    |
